# Supplementary material for: Integrated mechanistic engineering models and macroeconomic input–output approach to model physical economy for evaluating the impact of transition to a circular economy
Source: Royal Society of Chemistry journal article supplement (doi:10.1039/d1ee00544h), 2021-01-01
Supplement: d1ee00544h1.xlsx [file d1ee00544h1.xlsx]

## Sheet: PST
Commodity	CORN_ETHANOL	BIODIESEL	SOYOIL	UREA	Bean_farming	Corn_farming	Hog_farming	Potato_farming	Soybean_farming	Wheat_farming	ROE
AIR			11								5.5
AMMONIA											233334798
CO2_MIX_01											318075168
CORN	43758					3.17628e+08
DDGS	4804404
ETHANOL	4514120										258742940
HEXANE			2340000								707500
METHANOL											59660
NFDS											75158
NFDS_MIX_01											727239
N_FERTILIZER				536166928
SOYBEAN									1.10417e+08
SOYBEAN_BIODIESEL		506238
SOYBEAN_HULLS			1330000
SOYBEAN_MEAL			3150000
SOYBEAN_OIL			1330000
WATER			900900								6.30914e+06
YEAST											2738
P_FERTILIZER											5.96615e+06
K_FERTILIZER											8.01113e+06
BEANS					129698
POTATO								165192
WHEAT										8.2395e+06
SOYMEAL											517852
HOGS							1.23021e+06
GLYCERINE_WASTE		219638
METHANOL_WASTE		2244
SOYBEAN_WASTE			289100
CO2_ETHANOL_WAT_WASTE_MIX	2343327
CO2_WASTE_02	4618619
CO2_WAT_WASTE_MIX_01	20234
ETHANOL_WATER_WASTE_MIX	149044175
NITROGEN_MIX_WASTE_04				15532192
WATER_ETHANOL_MIX_WASTE_02	2028270
WATER_WASTE_08	1822591
HOG_MANURE							4.61899e+06
OTHER_INPUT											5.69577e+08
OTHER_OUTPUT							2.80494e+06
IMPORTED COMMODITIES											1471000
SLACK
	169239498	728120	9340011	551699120	129698	3.17628e+08	8.65413e+06	165192	1.10417e+08	8.2395e+06	1.40358e+09

## Sheet: PUT
Commodity	CORN_ETHANOL	BIODIESEL	SOYOIL	UREA	Bean_farming	Corn_farming	Hog_farming	Potato_farming	Soybean_farming	Wheat_farming	ROE	EXPORTS	FINAL_DEMAND
AIR			11										5.5
AMMONIA				2.33277e+08									57971.2
CO2_MIX_01				3.1786e+08									214710
CORN	14586040						1.38094e+06				1.42869e+08		1.58836e+08
DDGS							567171				1.83503e+06		2402202
ETHANOL												261000000	2257060
HEXANE			1.79513e+06										1.25237e+06
METHANOL		59660
NFDS	75158
NFDS_MIX_01	727239
N_FERTILIZER					1612.01	5.67132e+06			705253		2.61705e+08		268083464
SOYBEAN			7000000								4.82085e+07		5.52085e+07
SOYBEAN_BIODIESEL											253119		253119
SOYBEAN_HULLS											665000		665000
SOYBEAN_MEAL											1575000		1575000
SOYBEAN_OIL		609000									56000		665000
WATER	513423	58000					6.18817e+06						450450
YEAST	2738
P_FERTILIZER					806.003	3.56107e+06			2.40427e+06
K_FERTILIZER					1477.67	4.45134e+06			3.55831e+06
BEANS											64849.2		64849.2
POTATO											82595.9		82595.9
WHEAT											4.11975e+06		4.11975e+06
SOYMEAL							517852
HOGS											615106		615106
GLYCERINE_WASTE											219638
METHANOL_WASTE											2244
SOYBEAN_WASTE											289100
CO2_ETHANOL_WAT_WASTE_MIX											2343327
CO2_WASTE_02											4618619
CO2_WAT_WASTE_MIX_01											20234
ETHANOL_WATER_WASTE_MIX											149044175
NITROGEN_MIX_WASTE_04											15532192
WATER_ETHANOL_MIX_WASTE_02											2028270
WATER_WASTE_08											1822591
HOG_MANURE											4.61899e+06
OTHER_INPUT	153334900	1460		16154	125803	3.03945e+08		165192	1.03749e+08	8.2395e+06
OTHER_OUTPUT											2.80494e+06
IMPORTED COMMODITIES			544871	545681									380448
SLACK											7.58184e+08
	169239498	728120	9340011	551699120	129698	3.17628e+08	8.65413e+06	165192	1.10417e+08	8.2395e+06	1.40358e+09

## Sheet: PIOT
	CORN_ETHANOL	BIODIESEL	SOYOIL	UREA	Bean_farming	Corn_farming	Hog_farming	Potato_farming	Soybean_farming	Wheat_farming	ROE	EXPORTS	FINAL_DEMAND	WASTE		TOTAL
CORN_ETHANOL	2009.16						567362				1.85471e+06	4.47542e+06	2.46278e+06	159877216		169239498
BIODIESEL											253119		253119	221882		728120
SOYOIL	64152.6	616247	1.37838e+06				773216				2296000		3.92291e+06	289100		9340011
UREA					1612.01	5.67132e+06			705253		2.61705e+08		268083464	15532192		551699120
Bean_farming											64849.2		64849.2			129698
Corn_farming	1.4584e+07						1.38075e+06				1.42849e+08		1.58814e+08			3.17628e+08
Hog_farming											3.42004e+06		615106	4.61899e+06		8.65413e+06
Potato_farming											82595.9		82595.9			165192
Soybean_farming			7000000								4.82085e+07		5.52085e+07			1.10417e+08
Wheat_farming											4.11975e+06		4.11975e+06			8.2395e+06
ROE	1.54589e+08	111873	416756	5.51153e+08	128086	3.11957e+08	5.93281e+06	165192	1.09712e+08	8.2395e+06		2.56525e+08	3.17595e+06			1.40211e+09
IMPORTS			544871	545681									380448
SLACK											9.37252e+08
TOTAL	169239498	728120	9.34001e+06	5.51699e+08	129698	3.17628e+08	8.65413e+06	165192	1.10417e+08	8.2395e+06	1.40211e+09

## Sheet: PST_after
Commodity	CORN_ETHANOL	BIODIESEL	SOYOIL	UREA	WATER_RECYCLING	BEAN_FARMING	CORN_FARMING	HOG_FARMING	MANURE_RECYCLING	POTATO_FARMING	SOYBEAN_FARMING	WHEAT_FARMING	ROE
AIR			11										5.5
AMMONIA													233334798
BIOGAS					2755478
CO2_MIX_01													318075168
CORN	43758						3.17628e+08
DDGS	4804404
ETHANOL	4514120												258742940
HEXANE			2340000										707500
METHANOL													59660
NFDS													75158
NFDS_MIX_01													727239
N_FERTILIZER				536166928					30744.4
SOYBEAN											1.10417e+08
SOYBEAN_BIODIESEL		506238
SOYBEAN_HULLS			1330000
SOYBEAN_MEAL			3150000
SOYBEAN_OIL			1330000
WATER			900900		145598613
YEAST													2738
P_FERTILIZER									11712.2				5.95444e+06
K_FERTILIZER													8.01113e+06
BEANS						129698
POTATO										165192
WHEAT												8.2395e+06
SOYMEAL													517852
HOGS								1.23021e+06
GLYCERINE_WASTE		219638
METHANOL_WASTE		2244
SOYBEAN_WAST_RECYL			289100
WATER_RECYCLING_WASTE					7142963
CO2_ETHANOL_WAT_RECYL_MIX	2343327
CO2_WASTE_02	4618619
CO2_WAT_RECYL_MIX_01	20234
ETHANOL_WATER_RECYL_MIX	149044175
NITROGEN_MIX_WASTE_04				15532192
WATER_ETHANOL_MIX_RECYL_02	2028270
WATER_RECYL_08	1822591
HOG_MNURE_RECYL								4.61899e+06
OTHER_INPUT													5.69577e+08
OTHER_OUTPUT					50643			2.80494e+06	4.57653e+06
IMPORTED COMMODITIES													1471000
SLACK

## Sheet: PUT_after
Commodity	CORN_ETHANOL	BIODIESEL	SOYOIL	UREA	WATER_RECYCLING	BEAN_FARMING	CORN_FARMING	HOG_FARMING	MANURE_RECYCLING	POTATO_FARMING	SOYBEAN_FARMING	WHEAT_FARMING	ROE	EXPORTS	FINAL_DEMAND
AIR			11												5.5
AMMONIA				2.33277e+08											57971.2
BIOGAS													2755478
CO2_MIX_01				3.1786e+08											214710
CORN	14586040							1.38094e+06					1.42869e+08		1.58836e+08
DDGS								567171					1.83503e+06		2402202
ETHANOL														261000000	2257060
HEXANE			1.79513e+06												1.25237e+06
METHANOL		59660
NFDS	75158
NFDS_MIX_01	727239
N_FERTILIZER						1612.01	5.67132e+06				705253		2.61736e+08		268083464
SOYBEAN			7000000										4.82085e+07		5.52085e+07
SOYBEAN_BIODIESEL													253119		253119
SOYBEAN_HULLS													665000		665000
SOYBEAN_MEAL													1575000		1575000
SOYBEAN_OIL		609000											56000		665000
WATER	513423	58000						6.18817e+06					1.39289e+08		450450
YEAST	2738
P_FERTILIZER						806.003	3.56107e+06				2.40427e+06
K_FERTILIZER						1477.67	4.45134e+06				3.55831e+06
BEANS													64849.2		64849.2
POTATO													82595.9		82595.9
WHEAT													4.11975e+06		4.11975e+06
SOYMEAL								517852
HOGS													615106		615106
GLYCERINE_WASTE													219638
METHANOL_WASTE													2244
SOYBEAN_WAST_RECYL					289100
WATER_RECYCLING_WASTE													7142963
CO2_ETHANOL_WAT_RECYL_MIX					2343327
CO2_WASTE_02													4618619
CO2_WAT_RECYL_MIX_01					20234
ETHANOL_WATER_RECYL_MIX					149044175
NITROGEN_MIX_WASTE_04													15532192
WATER_ETHANOL_MIX_RECYL_02					2028270
WATER_RECYL_08					1822591
HOG_MNURE_RECYL									4.61899e+06
OTHER_INPUT	153334900	1460		16154		125803	3.03945e+08			165192	1.03749e+08	8.2395e+06
OTHER_OUTPUT													7.43211e+06
IMPORTED COMMODITIES			544871	545681											380448
SLACK													7.58184e+08

## Sheet: PIOT_after
	CORN_ETHANOL	BIODIESEL	SOYOIL	UREA	WATER_RECYCLING	BEAN_FARMING	CORN_FARMING	HOG_FARMING	MANURE_RECYCLING	POTATO_FARMING	SOYBEAN_FARMING	WHEAT_FARMING	ROE	EXPORTS	FINAL_DEMAND	WASTE		TOTAL
CORN_ETHANOL	2009.16				155258597			567362					1.85471e+06	4.47542e+06	2.46278e+06	4618619		169239498
BIODIESEL													253119		253119	221882		728120
SOYOIL	3157.3	609357	1.37838e+06		289100			38054.2					3.15256e+06		3.8694e+06			9.34001e+06
UREA						1611.92	5.671e+06				705212		2.61721e+08		2.68068e+08	15532192		5.51699e+08
WATER_RECYCLING	510266	57643.3						6.15012e+06					1.41239e+08		447680	7142963		1.55548e+08
BEAN_FARMING													64849.2		64849.2			129698
CORN_FARMING	1.4584e+07							1.38075e+06					1.42849e+08		1.58814e+08			3.17628e+08
HOG_FARMING									4.61899e+06				3.42004e+06		615106			8.65413e+06
MANURE_RECYCLING						1.675	7315.93				4760.27		4.59154e+06		15371.3			4.61899e+06
POTATO_FARMING													82595.9		82595.9			165192
SOYBEAN_FARMING			7000000										4.82085e+07		5.52085e+07			1.10417e+08
WHEAT_FARMING													4.11975e+06		4.11975e+06			8.2395e+06
ROE	154140035	61120	416756	5.51153e+08		128085	3.1195e+08	517852		165192	1.09707e+08	8.2395e+06		2.56525e+08	2.78179e+06			1.39579e+09
IMPORTS			544871	545681											380448
SLACK													7.84228e+08
TOTAL	169239498	728120	9.34001e+06	5.51699e+08	155547697	129698	3.17628e+08	8.65413e+06	4.61899e+06	165192	1.10417e+08	8.2395e+06	1.39579e+09

## Sheet: PIOT_compare
BEFORE_CE	CORN_ETHANOL	BIODIESEL	SOYOIL	UREA	Bean_farming	Corn_farming	Hog_farming	Potato_farming	Soybean_farming	Wheat_farming	ROE	EXPORTS	FINAL_DEMAND	WASTE		TOTAL
CORN_ETHANOL	2009.16						567362				1.85471e+06	4.47542e+06	2.46278e+06	159877216		169239498
BIODIESEL											253119		253119	221882		728120
SOYOIL	64152.6	616247	1.37838e+06				773216				2296000		3.92291e+06	289100		9340011
UREA					1612.01	5.67132e+06			705253		2.61705e+08		268083464	15532192		551699120
Bean_farming											64849.2		64849.2			129698
Corn_farming	1.4584e+07						1.38075e+06				1.42849e+08		1.58814e+08			3.17628e+08
Hog_farming											8.03903e+06		615106			8.65413e+06
Potato_farming											82595.9		82595.9			165192
Soybean_farming			7000000								4.82085e+07		5.52085e+07			1.10417e+08
Wheat_farming											4.11975e+06		4.11975e+06			8.2395e+06
ROE	1.54589e+08	111873	416756	5.51153e+08	128086	3.11957e+08	5.93281e+06	165192	1.09712e+08	8.2395e+06		2.56525e+08	3.17595e+06			1.40211e+09
IMPORTS			544871	545681									380448
SLACK											9.32633e+08
TOTAL	169239498	728120	9.34001e+06	5.51699e+08	129698	3.17628e+08	8.65413e+06	165192	1.10417e+08	8.2395e+06	1.40211e+09	261000000	4.97184e+08	175920390
AFTER_CE	CORN_ETHANOL	BIODIESEL	SOYOIL	UREA	WATER_RECYCLING	BEAN_FARMING	CORN_FARMING	HOG_FARMING	MANURE_RECYCLING	POTATO_FARMING	SOYBEAN_FARMING	WHEAT_FARMING	ROE	EXPORTS	FINAL_DEMAND	WASTE		TOTAL
CORN_ETHANOL	2009.16				155258597			567362					1.85471e+06	4.47542e+06	2.46278e+06	4618619		169239498
BIODIESEL													253119		253119	221882		728120
SOYOIL	3157.3	609357	1.37838e+06		289100			38054.2					3.15256e+06		3.8694e+06			9.34001e+06
UREA						1611.92	5.671e+06				705212		2.61721e+08		2.68068e+08	15532192		5.51699e+08
WATER_RECYCLING	510266	57643.3						6.15012e+06					1.41239e+08		447680	7142963		1.55548e+08
BEAN_FARMING													64849.2		64849.2			129698
CORN_FARMING	1.4584e+07							1.38075e+06					1.42849e+08		1.58814e+08			3.17628e+08
HOG_FARMING									4.61899e+06				3.42004e+06		615106			8.65413e+06
MANURE_RECYCLING						1.675	7315.93				4760.27		4.59154e+06		15371.3			4.61899e+06
POTATO_FARMING													82595.9		82595.9			165192
SOYBEAN_FARMING			7000000										4.82085e+07		5.52085e+07			1.10417e+08
WHEAT_FARMING													4.11975e+06		4.11975e+06			8.2395e+06
ROE	154140035	61120	416756	5.51153e+08		128085	3.1195e+08	517852		165192	1.09707e+08	8.2395e+06		2.56525e+08	2.78179e+06			1.39579e+09
IMPORTS			544871	545681											380448
SLACK													7.84228e+08
TOTAL	169239498	728120	9.34001e+06	5.51699e+08	155547697	129698	3.17628e+08	8.65413e+06	4.61899e+06	165192	1.10417e+08	8.2395e+06	1.39579e+09	261000000	4.97184e+08	27515656
																TOTAL WASTE REDUCTION		148404734

## Sheet: deltaX_before
	CORN_ETHANOL	BIODIESEL	SOYOIL	UREA	Bean_farming	Corn_farming	Hog_farming	Potato_farming	Soybean_farming	Wheat_farming	ROE	EXPORTS	FINAL_DEMAND	WASTE		TOTAL		TOTAL - WASTE
CORN_ETHANOL	2009.16						567362				1.85471e+06	4.47542e+06	2.46278e+06	159877216		169239498		9362282
BIODIESEL											253119		253119	221882		728120		506238
SOYOIL	64152.6	616247	1.37838e+06				773216				2296000		3.92291e+06	289100		9340011		9050911
UREA					1612.01	5.67132e+06			705253		2.61705e+08		268083464	15532192		551699120		536166928
Bean_farming											64849.2		64849.2			129698		129698
Corn_farming	1.4584e+07						1.38075e+06				1.42849e+08		1.58814e+08			3.17628e+08		3.17628e+08
Hog_farming											3.42004e+06		615106	4.61899e+06		8.65413e+06		4.03515e+06
Potato_farming											82595.9		82595.9			165192		165192
Soybean_farming			7000000								4.82085e+07		5.52085e+07			1.10417e+08		1.10417e+08
Wheat_farming											4.11975e+06		4.11975e+06			8.2395e+06		8.2395e+06
ROE	1.54589e+08	111873	416756	5.51153e+08	128086	3.11957e+08	5.93281e+06	165192	1.09712e+08	8.2395e+06		2.56525e+08	3.17595e+06			1.40211e+09		1.40211e+09
IMPORTS			544871	545681									380448
SLACK											9.37252e+08
TOTAL	169239498	728120	9.34001e+06	5.51699e+08	129698	3.17628e+08	8.65413e+06	165192	1.10417e+08	8.2395e+06	1.40211e+09	261000000	4.97184e+08	1.80539e+08
A matrix	CORN_ETHANOL	BIODIESEL	SOYOIL	UREA	Bean_farming	Corn_farming	Hog_farming	Potato_farming	Soybean_farming	Wheat_farming	ROE		delta_FD	tons		delta_X = L*delta_FD	tons
CORN_ETHANOL	0.000214602	0	0	0	0	0	0.140605	0	0	0	0.0013228		CORN_ETHANOL	1		CORN_ETHANOL	1.22526
BIODIESEL	0	0	0	0	0	0	0	0	0	0	0.000180528		BIODIESEL	1		BIODIESEL	1.00915
SOYOIL	0.00685224	1.21731	0.152292	0	0	0	0.19162	0	0	0	0.00163754		SOYOIL	1		SOYOIL	2.99053
UREA	0	0	0	0	0.0124289	0.0178552	0	0	0.00638717	0	0.186652		UREA	1		UREA	10.6517
Bean_farming	0	0	0	0	0	0	0	0	0	0	4.62512e-05		Bean_farming	1		Bean_farming	1.00234
Corn_farming	1.55774	0	0	0	0	0	0.342181	0	0	0	0.101882		Corn_farming	1		Corn_farming	8.45458
Hog_farming	0	0	0	0	0	0	0	0	0	0	0.00243922		Hog_farming	1		Hog_farming	1.12357
Potato_farming	0	0	0	0	0	0	0	0	0	0	5.89084e-05		Potato_farming	1		Potato_farming	1.00298
Soybean_farming	0	0	0.773403	0	0	0	0	0	0	0	0.0343829		Soybean_farming	1		Soybean_farming	5.05477
Wheat_farming	0	0	0	0	0	0	0	0	0	0	0.00293826		Wheat_farming	1		Wheat_farming	1.14886
ROE	16.5119	0.220989	0.0460458	1.02795	0.987571	0.982145	1.47028	1	0.993613	1	0		ROE	1		ROE	50.6613
I matrix	CORN_ETHANOL	BIODIESEL	SOYOIL	UREA	Bean_farming	Corn_farming	Hog_farming	Potato_farming	Soybean_farming	Wheat_farming	ROE
CORN_ETHANOL	1	0	0	0	0	0	0	0	0	0	0
BIODIESEL	0	1	0	0	0	0	0	0	0	0	0
SOYOIL	0	0	1	0	0	0	0	0	0	0	0
UREA	0	0	0	1	0	0	0	0	0	0	0
Bean_farming	0	0	0	0	1	0	0	0	0	0	0
Corn_farming	0	0	0	0	0	1	0	0	0	0	0
Hog_farming	0	0	0	0	0	0	1	0	0	0	0
Potato_farming	0	0	0	0	0	0	0	1	0	0	0
Soybean_farming	0	0	0	0	0	0	0	0	1	0	0
Wheat_farming	0	0	0	0	0	0	0	0	0	1	0
ROE	0	0	0	0	0	0	0	0	0	0	1
(I-A) matrix	CORN_ETHANOL	BIODIESEL	SOYOIL	UREA	Bean_farming	Corn_farming	Hog_farming	Potato_farming	Soybean_farming	Wheat_farming	ROE
CORN_ETHANOL	0.999785	0	0	0	0	0	-0.140605	0	0	0	-0.0013228
BIODIESEL	0	1	0	0	0	0	0	0	0	0	-0.000180528
SOYOIL	-0.00685224	-1.21731	0.847708	0	0	0	-0.19162	0	0	0	-0.00163754
UREA	0	0	0	1	-0.0124289	-0.0178552	0	0	-0.00638717	0	-0.186652
Bean_farming	0	0	0	0	1	0	0	0	0	0	-4.62512e-05
Corn_farming	-1.55774	0	0	0	0	1	-0.342181	0	0	0	-0.101882
Hog_farming	0	0	0	0	0	0	1	0	0	0	-0.00243922
Potato_farming	0	0	0	0	0	0	0	1	0	0	-5.89084e-05
Soybean_farming	0	0	-0.773403	0	0	0	0	0	1	0	-0.0343829
Wheat_farming	0	0	0	0	0	0	0	0	0	1	-0.00293826
ROE	-16.5119	-0.220989	-0.0460458	-1.02795	-0.987571	-0.982145	-1.47028	-1	-0.993613	-1	1
L matrix	CORN_ETHANOL	BIODIESEL	SOYOIL	UREA	Bean_farming	Corn_farming	Hog_farming	Potato_farming	Soybean_farming	Wheat_farming	ROE
CORN_ETHANOL	1.04789	0.00368565	0.00254907	0.00271023	0.00263745	0.00263785	0.152605	0.00263653	0.002637	0.00263653	0.00263653
BIODIESEL	0.00516524	1.0004	0.000276196	0.000293658	0.000285772	0.000285815	0.001297	0.000285673	0.000285724	0.000285673	0.000285673
SOYOIL	0.0869337	1.44209	1.18387	0.00448276	0.00436238	0.00436305	0.246981	0.00436087	0.00436165	0.00436087	0.00436087
UREA	5.4288	0.424663	0.294627	1.30706	0.311242	0.316713	1.36733	0.298709	0.305149	0.298709	0.298709
Bean_farming	0.00132334	0.000102313	7.07615e-05	7.52352e-05	1.00007	7.3226e-05	0.000332292	7.31895e-05	7.32025e-05	7.31895e-05	7.31895e-05
Corn_farming	4.57126	0.232961	0.161121	0.171307	0.166707	1.16673	1.31787	0.166649	0.166679	0.166649	0.166649
Hog_farming	0.0697906	0.0053958	0.00373185	0.00396779	0.00386124	0.00386182	1.01752	0.0038599	0.00386059	0.0038599	0.0038599
Potato_farming	0.00168548	0.000130312	9.01263e-05	9.58242e-05	9.3251e-05	9.32652e-05	0.000423228	1.00009	9.32353e-05	9.32187e-05	9.32187e-05
Soybean_farming	1.05099	1.19138	0.968211	0.0593964	0.0578014	0.0578102	0.43804	0.0577814	1.05779	0.0577814	0.0577814
Wheat_farming	0.0840691	0.00649973	0.00449535	0.00477956	0.00465121	0.00465192	0.0211099	0.0046496	0.00465043	1.00465	0.0046496
ROE	28.6119	2.2121	1.52994	1.62666	1.58298	1.58322	7.18451	1.58243	1.58272	1.58243	1.58243

## Sheet: deltaX_after
	CORN_ETHANOL	BIODIESEL	SOYOIL	UREA	WATER_RECYCLING	BEAN_FARMING	CORN_FARMING	HOG_FARMING	MANURE_RECYCLING	POTATO_FARMING	SOYBEAN_FARMING	WHEAT_FARMING	ROE	EXPORTS	FINAL_DEMAND	WASTE		TOTAL		TOTAL - WASTE
CORN_ETHANOL	2009.16				155258597			567362					1.85471e+06	4.47542e+06	2.46278e+06	4618619		169239498		164620879
BIODIESEL													253119		253119	221882		728120		506238
SOYOIL	3157.3	609357	1.37838e+06		289100			38054.2					3.15256e+06		3.8694e+06			9.34001e+06		9.34001e+06
UREA						1611.92	5.671e+06				705212		2.61721e+08		2.68068e+08	15532192		5.51699e+08		5.36167e+08
WATER_RECYCLING	510266	57643.3						6.15012e+06					1.41239e+08		447680	7142963		1.55548e+08		1.48405e+08
BEAN_FARMING													64849.2		64849.2			129698		129698
CORN_FARMING	1.4584e+07							1.38075e+06					1.42849e+08		1.58814e+08			3.17628e+08		3.17628e+08
HOG_FARMING									4.61899e+06				3.42004e+06		615106			8.65413e+06		8.65413e+06
MANURE_RECYCLING						1.675	7315.93				4760.27		4.59154e+06		15371.3			4.61899e+06		4.61899e+06
POTATO_FARMING													82595.9		82595.9			165192		165192
SOYBEAN_FARMING			7000000										4.82085e+07		5.52085e+07			1.10417e+08		1.10417e+08
WHEAT_FARMING													4.11975e+06		4.11975e+06			8.2395e+06		8.2395e+06
ROE	154140035	61120	416756	5.51153e+08		128085	3.1195e+08	517852		165192	1.09707e+08	8.2395e+06		2.56525e+08	2.78179e+06			1.39579e+09		1.39579e+09
IMPORTS			544871	545681											380448
SLACK													7.84228e+08
TOTAL	169239498	728120	9.34001e+06	5.51699e+08	155547697	129698	3.17628e+08	8.65413e+06	4.61899e+06	165192	1.10417e+08	8.2395e+06	1.39579e+09	261000000	4.97184e+08	27515656			COMPARING delta_X BEFORE AND AFTER CE
																			After_CE	Before_CE	After CE - Before CE
A matrix	CORN_ETHANOL	BIODIESEL	SOYOIL	UREA	WATER_RECYCLING	BEAN_FARMING	CORN_FARMING	HOG_FARMING	MANURE_RECYCLING	POTATO_FARMING	SOYBEAN_FARMING	WHEAT_FARMING	ROE		delta_FD	tons		delta_X = L*delta_FD	tons	tons	tons	%Change
CORN_ETHANOL	1.22048e-05	0	0	0	1.04618	0	0	0.0655596	0	0	0	0	0.00132879		CORN_ETHANOL	1		CORN_ETHANOL	4.26963	1.22526	3.04437	2.48468
BIODIESEL	0	0	0	0	0	0	0	0	0	0	0	0	0.000181345		BIODIESEL	1		BIODIESEL	1.00377	1.00915	-0.0053726	-0.0053239
SOYOIL	1.91792e-05	1.2037	0.147578	0	0.00194805	0	0	0.00439723	0	0	0	0	0.00225863		SOYOIL	1		SOYOIL	2.65847	2.99053	-0.33206	-0.111037
UREA	0	0	0	0	0	0.0124282	0.0178542	0	0	0	0.00638681	0	0.187508		UREA	1		UREA	5.00336	10.6517	-5.64835	-0.530276
WATER_RECYCLING	0.00309964	0.113866	0	0	0	0	0	0.710657	0	0	0	0	0.10119		WATER_RECYCLING	0		WATER_RECYCLING	3.02865	0	3.02865	1
BEAN_FARMING	0	0	0	0	0	0	0	0	0	0	0	0	4.64607e-05		BEAN_FARMING	1		BEAN_FARMING	1.00097	1.00234	-0.00137646	-0.00137324
CORN_FARMING	0.0885916	0	0	0	0	0	0	0.159548	0	0	0	0	0.102343		CORN_FARMING	1		CORN_FARMING	3.68631	8.45458	-4.76827	-0.563986
HOG_FARMING	0	0	0	0	0	0	0	0	1	0	0	0	0.00245026		HOG_FARMING	1		HOG_FARMING	1.11968	1.12357	-0.00388977	-0.00346196
MANURE_RECYCLING	0	0	0	0	0	1.29146e-05	2.3033e-05	0	0	0	4.31117e-05	0	0.00328957		MANURE_RECYCLING	0		MANURE_RECYCLING	0.0687026	0	0.0687026	1
POTATO_FARMING	0	0	0	0	0	0	0	0	0	0	0	0	5.91752e-05		POTATO_FARMING	1		POTATO_FARMING	1.00123	1.00298	-0.00175315	-0.00174793
SOYBEAN_FARMING	0	0	0.749464	0	0	0	0	0	0	0	0	0	0.0345386		SOYBEAN_FARMING	1		SOYBEAN_FARMING	3.71106	5.05477	-1.34371	-0.26583
WHEAT_FARMING	0	0	0	0	0	0	0	0	0	0	0	0	0.00295156		WHEAT_FARMING	1		WHEAT_FARMING	1.06141	1.14886	-0.0874441	-0.076114
ROE	0.936333	0.120734	0.0446205	1.02795	0	0.987559	0.982123	0.0598387	0	1	0.99357	1	0		ROE	1		ROE	20.8066	50.6613	-29.8547	-0.5893
I matrix	CORN_ETHANOL	BIODIESEL	SOYOIL	UREA	WATER_RECYCLING	BEAN_FARMING	CORN_FARMING	HOG_FARMING	MANURE_RECYCLING	POTATO_FARMING	SOYBEAN_FARMING	WHEAT_FARMING	ROE
CORN_ETHANOL	1	0	0	0	0	0	0	0	0	0	0	0	0
BIODIESEL	0	1	0	0	0	0	0	0	0	0	0	0	0
SOYOIL	0	0	1	0	0	0	0	0	0	0	0	0	0
UREA	0	0	0	1	0	0	0	0	0	0	0	0	0
WATER_RECYCLING	0	0	0	0	1	0	0	0	0	0	0	0	0
BEAN_FARMING	0	0	0	0	0	1	0	0	0	0	0	0	0
CORN_FARMING	0	0	0	0	0	0	1	0	0	0	0	0	0
HOG_FARMING	0	0	0	0	0	0	0	1	0	0	0	0	0
MANURE_RECYCLING	0	0	0	0	0	0	0	0	1	0	0	0	0
POTATO_FARMING	0	0	0	0	0	0	0	0	0	1	0	0	0
SOYBEAN_FARMING	0	0	0	0	0	0	0	0	0	0	1	0	0
WHEAT_FARMING	0	0	0	0	0	0	0	0	0	0	0	1	0
ROE	0	0	0	0	0	0	0	0	0	0	0	0	1
(I-A) matrix	CORN_ETHANOL	BIODIESEL	SOYOIL	UREA	WATER_RECYCLING	BEAN_FARMING	CORN_FARMING	HOG_FARMING	MANURE_RECYCLING	POTATO_FARMING	SOYBEAN_FARMING	WHEAT_FARMING	ROE
CORN_ETHANOL	0.999988	0	0	0	-1.04618	0	0	-0.0655596	0	0	0	0	-0.00132879
BIODIESEL	0	1	0	0	0	0	0	0	0	0	0	0	-0.000181345
SOYOIL	-1.91792e-05	-1.2037	0.852422	0	-0.00194805	0	0	-0.00439723	0	0	0	0	-0.00225863
UREA	0	0	0	1	0	-0.0124282	-0.0178542	0	0	0	-0.00638681	0	-0.187508
WATER_RECYCLING	-0.00309964	-0.113866	0	0	1	0	0	-0.710657	0	0	0	0	-0.10119
BEAN_FARMING	0	0	0	0	0	1	0	0	0	0	0	0	-4.64607e-05
CORN_FARMING	-0.0885916	0	0	0	0	0	1	-0.159548	0	0	0	0	-0.102343
HOG_FARMING	0	0	0	0	0	0	0	1	-1	0	0	0	-0.00245026
MANURE_RECYCLING	0	0	0	0	0	-1.29146e-05	-2.3033e-05	0	1	0	-4.31117e-05	0	-0.00328957
POTATO_FARMING	0	0	0	0	0	0	0	0	0	1	0	0	-5.91752e-05
SOYBEAN_FARMING	0	0	-0.749464	0	0	0	0	0	0	0	1	0	-0.0345386
WHEAT_FARMING	0	0	0	0	0	0	0	0	0	0	0	1	-0.00295156
ROE	-0.936333	-0.120734	-0.0446205	-1.02795	0	-0.987559	-0.982123	-0.0598387	0	-1	-0.99357	-1	1
L matrix	CORN_ETHANOL	BIODIESEL	SOYOIL	UREA	WATER_RECYCLING	BEAN_FARMING	CORN_FARMING	HOG_FARMING	MANURE_RECYCLING	POTATO_FARMING	SOYBEAN_FARMING	WHEAT_FARMING	ROE
CORN_ETHANOL	1.2137	0.398866	0.190692	0.210353	1.27012	0.204715	0.204755	1.02794	1.02794	0.204634	0.204706	0.204634	0.204634
BIODIESEL	0.000340038	1.00045	0.000308089	0.000339909	0.000356342	0.000330782	0.000330832	0.000349455	0.000349455	0.000330667	0.000330726	0.000330667	0.000330667
SOYOIL	0.00599118	1.42027	1.17853	0.00595923	0.00856371	0.0057993	0.00580025	0.0129332	0.0129332	0.00579719	0.00579854	0.00579719	0.00579719
UREA	0.357414	0.479251	0.32801	1.35569	0.374559	0.358569	0.364048	0.369846	0.369846	0.34602	0.35247	0.34602	0.34602
WATER_RECYCLING	0.201196	0.377193	0.1795	0.198009	1.21084	0.192702	0.192738	0.916746	0.916746	0.192625	0.192691	0.192625	0.192625
BEAN_FARMING	8.71178e-05	0.000115634	7.89326e-05	8.70848e-05	9.12949e-05	1.00008	8.47593e-05	8.95303e-05	8.95303e-05	8.47169e-05	8.47322e-05	8.47169e-05	8.47169e-05
CORN_FARMING	0.301145	0.292343	0.192329	0.212183	0.315428	0.206489	1.20652	0.449599	0.449599	0.206414	0.206461	0.206414	0.206414
HOG_FARMING	0.0107726	0.014342	0.00979651	0.0107665	0.0112892	0.0104903	0.010502	1.01107	1.01107	0.0104737	0.0105187	0.0104737	0.0104737
MANURE_RECYCLING	0.00617815	0.00824363	0.00563373	0.00617377	0.00647446	0.0060209	0.00603193	0.00635269	1.00635	0.0060059	0.00605009	0.0060059	0.0060059
POTATO_FARMING	0.000110959	0.000147279	0.000100533	0.000110917	0.000116279	0.000107938	0.000107955	0.000114031	0.000114031	1.00011	0.00010792	0.000107901	0.000107901
SOYBEAN_FARMING	0.069253	1.1504	0.941944	0.0692046	0.0742864	0.0673464	0.0673567	0.0762494	0.0762494	0.0673229	1.06734	0.0673229	0.0673229
WHEAT_FARMING	0.00553444	0.00734605	0.00501444	0.00553234	0.0057998	0.00538378	0.0053846	0.0056877	0.0056877	0.00538191	0.00538288	1.00538	0.00538191
ROE	1.87509	2.48887	1.69891	1.87438	1.96499	1.82404	1.82432	1.92701	1.92701	1.82341	1.82374	1.82341	1.82341

## Sheet: Commodity survey allocation
IMPORTS
		Bureau of Labor Stat data employee wage data (Annual wages)				Commodity Flow Survey annual flows in tons
Comodity	3 digit sector	6 digit sector	3 digit sector data	6 digit sector data	% composition	3 digit sector data	6 digit sector data
Ammonia	chemical manufacturing	N fertilizer manufacturing	5590198462	17566700	0.00314241	36999000	116266
Hexane	chemical manufacturing	Other organic chemical manufacturing	5590198462	139775001	0.0250036	36999000	925108
CO2_gas	chemical manufacturing	Industrial gas manufacturing	5590198462	65036957	0.0116341	36999000	430450
EXPORTS
		Bureau of Labor Stat data employee wage data (Annual wages)				Commodity Flow Survey annual flows in tons
Comodity	3 digit sector	6 digit sector	3 digit sector data	6 digit sector data	% composition	3 digit sector data	6 digit sector data
Corn ethanol	chemical manufacturing	Ethanol manufacturing	5590198462	39520246	0.00706956	36986501000	2.61478e+08
Commodity Flow Survey data for the year 2017 as used to identify available domestic imports and exports. (https://www.census.gov/programs-surveys/cfs/data/tables.2017.html)
State llevel annual wage data was used to allocate 3 digit level commodity flows to 6 digit level commodity flows
