# Supplementary material for: Integrated mechanistic engineering models and macroeconomic input–output approach to model physical economy for evaluating the impact of transition to a circular economy
Source: Royal Society of Chemistry journal article supplement (doi:10.1039/d1ee00544h), 2021-01-01
Supplement: d1ee00544h2.xlsx [file d1ee00544h2.xlsx]

## Sheet: Dry corn ethanol
###########################################################################################################
Corn to ethnaol production using dry corn milling for 2018 Illinois			ASPEN PLUS MODEL DEVELOPED
###########################################################################################################
Composition of corn is 15% moisture and dry basis:
70% starch
8% Non-fermentables (NFDS)
4% Soluble protein
5% Insoluble protein
6% C5 Polymers (Xylan and Arabinan)
3% C6 Polymers (non-starch)
4% Oil
___________________________________________________________________________________________________________________
Aspen plus model summary:
This is a model of a process for production of ethanol
from corn. It uses batch fermentors, with product
dehydration by molecular sieves. The six-effect evaporator
is driven by heat of condensation from the rectifier
overhead vapor. Hot process condensates and scrubber
water are used for mashing. Very little waste water is
produced. Mash concentration is adjustable using design
spec ethanol by setting target to desired final ethanol
concentration (g/l) in fermentors. Fermentor sizes are
calculated in Excel. Annual ethanol production is
adjustable using Fortran block scale.
___________________________________________________________________________________________________________________
Model scaling data:
Model scaling was done using either fortran scale block in the simulation or by using embedded excel workbook to scale the plant capacity.
Model was scaled to 2017 data using Primary Energy Production Estimates in Physical Units tables from US EIA (https://www.eia.gov/state/seds/seds-data-complete.php)
Fuel ethanol produced (2017*): 41,634,000 barrels (1748.628 MM gallons) (MM -million, US oil industry convention)

## Sheet: Soyoil with ouput side scaling
####################################################################################################################
		Soybeans to soybean oil and soymeal production for 2018 Illinois
####################################################################################################################
Soybean composition:
Moisture content at harvest: 13%
Protein: 33.8%
Carbohydrates: 19+6+9%
Oil: 19.2%
Oil is present in the form of triglycerides.
Data sources: U. S. Soybean Quality Report-2018, https://www.soymeal.org/soy-meal-articles/u-s-soybean-quality-report-2018 and Soybean wiki page
			ASPEN PLUS MODEL DEVELOPED
___________________________________________________________________________________________________________________
Aspen plus model summary:
Soybean oil is extracted from soybean using a solvent extraction process.
1. Soybean cleaning, drying and tempering
The first step in the solvent-extraction process involves cleaning the soybeans to remove the foreign material and drying
the soybeans to approxmately 9.5 percent moisture. The beans are tempered where the moisture content is allowed to equilibrate
to loosen the hull, which improves dehulling.
2. Soybean dehulling
The beans are cracked into 8 to 16 pieces by passing them through corrugated rolls of rollermills. A consistent bean size is
important to assure that the small beans will be cracked properly. The soybean hulls, which account for about 8 percent of the
soybean, are removed by aspiration. The dehulled soybeans are known as meats. Often, the hull fractions from the aspirators are
passed over a gravity table to salvage small pieces of meats that are aspirated along with the hulls.
3. Soybean cracking
There are several advantages for removing the hull: less total volume to process, which means greater extraction output per day
and improved protein content of the meal. The cracked soybean meats are heated to about 165°F to soften them prior to flaking.
If the soybean meats are not properly cracked and conditioned, the flaking may not achieve the desired cell rupture or distortion
necessary for efficient extraction and/or produce excessive fine material that interferes with efficient extraction.
Highly distorted cells extract more easily.
4. Soybean flaking
The heated and cracked meats are passed through a roller mill equipped with smooth surfaced rolls to produce flakes about 10-12
thousandths of an inch in thickness.
5. Oil extraction
The flakes are then made to dissolve in a solvent like hexane to extract the oil. The remaining solids are seperated out as soymeal
and the remaining oil dissolved in hexane is sent to the next stage.
6. Oil seperation
A flash evaporator type of device is used to heat the mixture and evaporate out hexane from oil.
Data sources:
a. Granjo, J., Duarte, B., & Oliveira, N. (2015). Soybean Biorefinery: Process Simulation and Analysis. https://doi.org/10.3303/CET1545098
b. https://www.soymeal.org/wp-content/uploads/2018/04/soybean_processing.pdf
c. http://www.fao.org/3/t0532e/t0532e04.htm
___________________________________________________________________________________________________________________
Scaling info in Soybean oil and meal data exel file in the SI
The following is the graph between the quantity of soybean used by the Aspen model vs the soybean oil produced.
Based on the set output data (6999433 tons), the corresponding input side data (1562443 tons) was selected.

## Sheet: Soybean biodiesel
###########################################################################################################
		Soy oil to Soydiesel production for 2018 Illinois
###########################################################################################################
Soy oil composition: Soybean oil is composed of many types of triglycerides (fatty acids) (TAGs). The complete list is given below.					ASPEN PLUS MODEL FOR SOYBEAN BIODEISEL
TAG	Percentage (%)
LLL	17.98
LLO	16.77
LLP	13.33
LLS+POL	11.82
OOL	9.2
LLLn	6.55
SOL	4.04
OOO	3.49
OLLn	3.3
PLLn	2.74
PPL	1.98
POO	1.95
OOS	1.67
LnLnL	1.62
PSL	1.44
LnLnLn	0.8
POS	0.56
PPO	0.51
PPLn	0.26
TAG species: L: linoleoyl; Ln: linolenoyl; O: oleoyl; P: palmitoyl; E: elaidoyl; S: stearoyl; B: behemoyl; Lg: lignoceroyl
Source: https://doi.org/10.1080/10942912.2015.1031246
In this model, it is approximated that the soybean oil is made up of 60% linoleic acid, 30% oleic acid and 10% palmitic acid.
___________________________________________________________________________________________________________________
Aspen plus model summary:
Soybean oil is converted into biodiesel by a series of trans esterification reactions in the presence of NaOH. Soybean undergoes trans
esterification in a CSTR reaction tank and the outputs are a mixture of methylated fatty acid molecules (biodiesel)
(ex: CH3-L, CH3-O and CH3-P), glycerol, unreacted intermediate products along with the catalyst NaOH. To separate out the biodiesel
from other components and RadFrac separation column is used to separate the output into three streams: 1) biofuel + unreacted
intermediate products, 2) glycerol and 3) catalyst -NaOH. Stream 1) is made to go through another RadFrac separation column to
separate out the biofuel and the unreacted intermediates are sent back to the initially input flow to be resent to CSTR for further processing.
The model scales only to (10/55)th size of individual plant in Illinois.Need better parameters for both the fractional distillation
columns to converge. This data comes from experiment so hard to get.
___________________________________________________________________________________________________________________
Model scaling data:
The Aspen model was scaled using the amount of soybean oil produced. It is assumed that all of the 2.9 billion lbs of oil produced
is converted into biodiesel in 2018 Illinois. The oil production data is attached in the SI (2018 soybean oil and meal monthy
data.xlsx). The biodiesel production data is available at Midwest regional level and not at Illinois level. So, a weighted approach
was used to calculate Illinois biodiesel production data. The Midwest produced a total of 1,220 million gallons of biodiesel in
2018 https://www.eia.gov/biofuels/biodiesel/production/table5.pdf) and has a production capacity of 1,464 million gallons per year
(https://www.eia.gov/biofuels/biodiesel/capacity/biodieselcapacity.xlsx). Illinois contributes to 12.5 % of the capacity.
Therefore, it is assumed that Illinois produced 12.5% of 1,220 million gallons, i.e 152.5 million gallons.
Plant output: 8417 ton/oper year (8766 hrs)

## Sheet: Hog farming
Hog feed and water intake modeling parameters
Age in weeks	Age in days	Weight (kg)	Daily gain (kg)	Daily feed intake (kg)	Water consumption per day (l)
4	28	7	0.21	0.35	0.9
6	42	12	0.4	0.75	1.9						Python model for hog farming
8	56	21	0.625	1	2.5
10	70	30	0.655	1.2	3						Code input 1: exel/csv file containing the table shown here describing the daily feed requirements for hogs
12	84	40	0.71	1.4	3.6
14	98	51	0.805	1.7	4.2						Code input 2: Hog farming cycle days
16	112	65	0.97	1.9	4.8
18	126	80	1.02	2.2	5.5						Code output:	No of hogs, hog mass, hog manure mass
20	140	95	1.12	2.4	6
22	154	110	1.1	2.65	6.6
total hog slaughtered by head = 12,242,900
link: https://quickstats.nass.usda.gov/results/D8EB79CD-D8B1-335A-9F90-4C4EB77919DA
Hog_days_cycle = 120

## Sheet: Corn farming
USDA NASS Data: https://quickstats.nass.usda.gov/
Crop: Corn
					Python code for corn farming model via PCSE
State: Illinois
					import sys, os
Year: 2018					import pandas as pd
					import pcse
Crop season: May - October					import numpy as np
					import yaml
Fertilizer:					import datetime
Units= lb/ac
Nitrogen = 172					from pcse.fileinput import YAMLCropDataProvider
Phosphate = 108					from pcse.fileinput import CABOFileReader
Potash = 135					from pcse.util import WOFOST71SiteDataProvider
Sulfur = 18					from pcse.base import ParameterProvider
					from pcse.fileinput import YAMLAgroManagementReader
Units = kg/ha					from pcse.db import NASAPowerWeatherDataProvider
Nitrogen = 192.786					from pcse.models import Wofost71_WLP_FD
Phosphate = 121.052
Potash = 151.315					aux_info = yaml.load(open('corn_agro.yaml'))
Sulfur = 20.1753
					#corn model
Water:					cropdata = YAMLCropDataProvider()
Units = ac ft/ ac
Total = 0.6					#cropdata
					cropdata.set_active_crop('maize', 'Grain_maize_201')
Acres harvested:
Units = ac
Total = 10800000					#soildata
					soildata = CABOFileReader('ec3.soil')
Production:
Units = bu
Total = 2268000000					# weather data
					wdp = NASAPowerWeatherDataProvider(latitude=40.4842, longitude=-88.9937)
					sitedata = WOFOST71SiteDataProvider(WAV=100, CO2=360)
					parameters = ParameterProvider(cropdata=cropdata, soildata=soildata, sitedata=sitedata)
					agromanagement = YAMLAgroManagementReader('corn_agro.yaml')
					wofsim = Wofost71_WLP_FD(parameters, wdp, agromanagement)
					wofsim.run_till_terminate()
					df_results = pd.DataFrame(wofsim.get_output())
					df_results = df_results.set_index("day")
					#biomass = df_results.iloc[-1,:]['TAGP']
					crop_yield = df_results.iloc[-1,:]['TWSO']
					#aux data
					npk_units = aux_info['AgroManagement'][0][datetime.date(2017, 5, 1)]['TimedEvents'][0]['comment'][7:]
					npk_applied = aux_info['AgroManagement'][0][datetime.date(2017, 5, 1)]['TimedEvents'][0]['events_table'][0][datetime.date(2017, 5, 10)]
					area = aux_info['ScalingData'][0]['area']['value'] #acres
					supply_data = [{'commodity': 'corn', 'value': crop_yield, 'unit': 'kg/ha'}]
					use_data = {'unit':npk_units,**npk_applied}
					#scaling
					supply_data[0]['value'] = supply_data[0]['value']*((1/25.4)/2.47)*area #1 bushel = 25.4 kg, 1 hectare = 2.47 ac
					supply_data[0]['unit'] = 'kg'
					use_data['N_amount'] = use_data['N_amount']*area*2.47
					use_data['P_amount'] = use_data['P_amount']*area*2.47
					use_data['K_amount'] = use_data['K_amount']*area*2.47
					use_data['unit'] = 'kg'

## Sheet: Soybean farming
USDA NASS Data: https://quickstats.nass.usda.gov/
Crop: Soybeans			Python code for soybean farming model via PCSE
State: Illinois			import sys, os
			import pandas as pd
Year: 2018			import pcse
			import numpy as np
Crop season: May - October			import datetime
			import yaml
Fertilizer:
Units= lb/ac			from pcse.fileinput import YAMLCropDataProvider
Nitrogen = 22			from pcse.fileinput import CABOFileReader
Phosphate = 75			from pcse.util import WOFOST71SiteDataProvider
Potash = 111			from pcse.base import ParameterProvider
Sulfur = 17			from pcse.fileinput import YAMLAgroManagementReader
			from pcse.db import NASAPowerWeatherDataProvider
Units = kg/ha			from pcse.models import Wofost71_WLP_FD
Nitrogen = 24.6587
Phosphate = 84.0638			aux_info = yaml.load(open('soybean_agro.yaml'))
Potash = 124.414
Sulfur = 19.0545			cropdata = YAMLCropDataProvider()
Water:			#cropdata
Units = ac ft/ ac			cropdata.set_active_crop('soybean', 'Soybean_906')
Total = 0.5
			#soildata
Acres harvested:			soildata = CABOFileReader('ec3.soil')
Units = ac
Irrigated = 184406			# weather data
Total = 10500000			wdp = NASAPowerWeatherDataProvider(latitude=40.4842, longitude=-88.9937)
Production:			sitedata = WOFOST71SiteDataProvider(WAV=100, CO2=360)
Units = bu			parameters = ParameterProvider(cropdata=cropdata, soildata=soildata, sitedata=sitedata)
Total = 666750000
			agromanagement = YAMLAgroManagementReader('soybean_agro.yaml')
			wofsim = Wofost71_WLP_FD(parameters, wdp, agromanagement)
			wofsim.run_till_terminate()
			df_results = pd.DataFrame(wofsim.get_output())
			df_results = df_results.set_index("day")
			#bio_mass = df_results.iloc[-1,:]['TAGP']
			crop_yield = df_results.iloc[-1,:]['TWSO']
			#aux data
			npk_units = aux_info['AgroManagement'][0][datetime.date(2017, 5, 1)]['TimedEvents'][0]['comment'][7:]
			npk_applied = aux_info['AgroManagement'][0][datetime.date(2017, 5, 1)]['TimedEvents'][0]['events_table'][0][datetime.date(2017, 5, 10)]
			area = aux_info['ScalingData'][0]['area']['value'] #acres
			supply_data = [{'commodity': 'soybean', 'value': crop_yield, 'unit': 'kg/ha'}]
			use_data = {'unit':npk_units,**npk_applied}
			#scaling
			supply_data[0]['value'] = supply_data[0]['value']*((1/27.22)/2.47)*area #1 bushel = 27.22 kg, 1 hectare = 2.47 ac
			supply_data[0]['unit'] = 'bushel'
			use_data['N_amount'] = use_data['N_amount']*area*2.47
			use_data['P_amount'] = use_data['P_amount']*area*2.47
			use_data['K_amount'] = use_data['K_amount']*area*2.47
			use_data['unit'] = 'kg'

## Sheet: Potato farming
USDA NASS Data: https://quickstats.nass.usda.gov/			Python code for potatoo farming via PCSE
			import sys, os
Crop: Potato			import pandas as pd
			import pcse
State: Illinois			import numpy as np
			import datetime
Year: 2018			import yaml
			from pcse.fileinput import YAMLCropDataProvider
Acres harvested:			from pcse.fileinput import CABOFileReader
Units = ac			from pcse.util import WOFOST71SiteDataProvider
Total = 7600			from pcse.base import ParameterProvider
			from pcse.fileinput import YAMLAgroManagementReader
Production:			from pcse.db import NASAPowerWeatherDataProvider
Units = cwt			from pcse.models import Wofost71_WLP_FD
Total = 2850000
			aux_info = yaml.load(open('potato_agro.yaml'))
			#corn model
			cropdata = YAMLCropDataProvider()
			#cropdata
			cropdata.set_active_crop('potato', 'Potato_702')
			#soildata
			soilfile = 'ec3.soil'
			soildata = CABOFileReader(soilfile)
			# weather data
			wdp = NASAPowerWeatherDataProvider(latitude=40.4842, longitude=-88.9937)
			sitedata = WOFOST71SiteDataProvider(WAV=100, CO2=360)
			parameters = ParameterProvider(cropdata=cropdata, soildata=soildata, sitedata=sitedata)
			agromanagement_file = 'potato_agro.yaml'
			agromanagement = YAMLAgroManagementReader(agromanagement_file)
			wofsim = Wofost71_WLP_FD(parameters, wdp, agromanagement)
			wofsim.run_till_terminate()
			df_results = pd.DataFrame(wofsim.get_output())
			df_results = df_results.set_index("day")
			Biomass = df_results.iloc[-1,:]['TAGP']
			crop_yield = df_results.iloc[-1,:]['TWSO']
			#aux data
			#npk_units = aux_info['AgroManagement'][0][datetime.date(2017, 5, 1)]['TimedEvents'][0]['comment'][7:]
			#npk_applied = aux_info['AgroManagement'][0][datetime.date(2017, 5, 1)]['TimedEvents'][0]['events_table'][0][datetime.date(2017, 5, 10)]
			area = aux_info['ScalingData'][0]['area']['value'] #acres
			supply_data = [{'commodity': 'soybean', 'value': crop_yield, 'unit': 'kg/ha'}]
			#use_data = {'unit':npk_units,**npk_applied}
			#scaling
			supply_data[0]['value'] = supply_data[0]['value']*(1/2.47)*area # 1 hectare = 2.47 ac
			supply_data[0]['unit'] = 'bushel'
			#use_data['N_amount'] = use_data['N_amount']*area*2.47
			#use_data['P_amount'] = use_data['P_amount']*area*2.47
			#use_data['K_amount'] = use_data['K_amount']*area*2.47
			#use_data['unit'] = 'kg'

## Sheet: Bean farming
USDA NASS Data: https://quickstats.nass.usda.gov/			Python code for bean farming via PCSE
Crop: Split beans			import sys, os
			import pandas as pd
State: Illinois			import pcse
			import numpy as np
Year: 2018			import datetime
			import yaml
Crop season: May - October
			from pcse.fileinput import YAMLCropDataProvider
Fertilizer:			from pcse.fileinput import CABOFileReader
Units= lb/ac			from pcse.util import WOFOST71SiteDataProvider
Nitrogen = 60			from pcse.base import ParameterProvider
Phosphate = 30			from pcse.fileinput import YAMLAgroManagementReader
Potash = 55			from pcse.db import NASAPowerWeatherDataProvider
Sulfur = 0			from pcse.models import Wofost71_WLP_FD
Units = kg/ha			aux_info = yaml.load(open('bean_agro.yaml'))
Nitrogen = 67.2511
Phosphate = 33.6255			#model
Potash = 61.6468			cropdata = YAMLCropDataProvider()
			#cropdata
Acres harvested:			cropdata.set_active_crop('fababean', 'Faba_bean_801')
Units = ac
Total = 10800000
			#soildata
Production:			soilfile = 'ec3.soil'
Units = cwt			soildata = CABOFileReader(soilfile)
Total = 800800
			# weather data
			wdp = NASAPowerWeatherDataProvider(latitude=40.4842, longitude=-88.9937)
			df_dates = [None]*len(wdp.store)
			NASA_dates = list(wdp.store.keys())
			for i in range(len(df_dates)):
			df_dates[i] = list(NASA_dates[i])[0]
			missing_dates = pd.date_range(start = '1983-07-1', end = datetime.datetime.today().strftime("%Y-%m-%d") ).difference(df_dates)
			missing_dates = list(missing_dates)
			for i in range(len(missing_dates)):
			missing_date = missing_dates[i]
			missing_date = pd.Timestamp(missing_date).date()
			#missing_dates[i] = missing_date
			previous_Date = missing_date - datetime.timedelta(days=1)
			wdp.store[(missing_date, 0)] = wdp.store[(previous_Date, 0)]
			sitedata = WOFOST71SiteDataProvider(WAV=100, CO2=360)
			parameters = ParameterProvider(cropdata=cropdata, soildata=soildata, sitedata=sitedata)
			agromanagement_file = 'bean_agro.yaml'
			agromanagement = YAMLAgroManagementReader(agromanagement_file)
			wofsim = Wofost71_WLP_FD(parameters, wdp, agromanagement)
			wofsim.run_till_terminate()
			df_results = pd.DataFrame(wofsim.get_output())
			df_results = df_results.set_index("day")
			#Biomass = df_results.iloc[-1,:]['TAGP']
			crop_yield_per_ha = df_results.iloc[-1,:]['TWSO']
			#1 ha = 2.47105 ac
			ac_harvested = 8800
			crop_yield = crop_yield_per_ha*2.47105*ac_harvested
			crop_yield_unit = 'kg'
			#aux data
			npk_applied = aux_info['AgroManagement'][0][datetime.date(2017, 5, 1)]['TimedEvents'][0]['events_table'][0][datetime.date(2017, 5, 10)]
			N_FERTILIZER = npk_applied['N_amount']*2.47105*ac_harvested
			P_FERTILIZER = npk_applied['P_amount']*2.47105*ac_harvested
			K_FERTILIZER = npk_applied['K_amount']*2.47105*ac_harvested
			npk_unit = 'kg'

## Sheet: Recycling-wastewater
AD model description
The process simulation model divides the digestion or fermentation
reactions into two groups of reaction-sets: (a) The reactions		The inputs to the model are waste-water and organic solid wastes from corn ethanol and soybean oil processing
of hydrolysis operating based on the extent of reaction (Table 1),
which is the fractional conversion of reactants into products on a		Stream Compund names from Aspen Plus models of soybean oil and corn ethanol systems
scale of 0.0–1.0. Hydrolysis is one of the rate-limiting steps in
AD, and henceforth a separate reaction-set was added. With a separate
reactions set for hydrolysis, the effect of pretreatment, which
improves the hydrolysis efficiency on different substrates, could be
studied in PSM. The other reaction-set (b) constitutes reactions of
other phases (acidogenic, acetogenic, and methanogenic reactions)
in AD functioning on a kinetic basis.
The input mix of the model contained a 10% total solids compounds in the wastewater		From Corn-Ethanol Sector
Of the 10% total solids, 85% of it were made of volatile Solids		corn_ethanol_CO2_WASTE
The model processes all the waste and converts it into methane and treated		corn_ethanol_WATER_01
water for industrial use		corn_ethanol_WATER_03
		WATER_08
Model source: https://doi.org/10.1016/j.biortech.2014.01.051
		From Soy-Oil sector
		SOYBEAN_01

## Sheet: Recycling-hog manure
Hog manure recycling model
In this model, all the hog manure is assumed to be used for composting which can then be used as fertilizers. Once all the hog manure is dumped into a compost pit, the micro organisms in the compost pit feed on the manure breakinging down large nutrient rich compounds into simpler compunds that are rich in nitrogen and phosphorus. When the fully composted manure is used as (partyl or in full) as …
									Python pseudo code
									Code inputs: total hog manure mass, mass of hogs
									Code outputs: Nitrogen and Phosphorus in compost
Manure production data: https://www.nrcs.usda.gov/wps/portal/nrcs/detail/null/?cid=nrcs143_014211#table1

[truncated: 1 more sheets: NAICS classification]
